# Supplementary material
Source: PubMed Central journal article supplement (PMC3398561)
Supplement: supp_tpc.112.097881_tpc097881Supplemental.pdf [file supp_tpc.112.097881_tpc097881Supplemental.pdf]

Figure S1

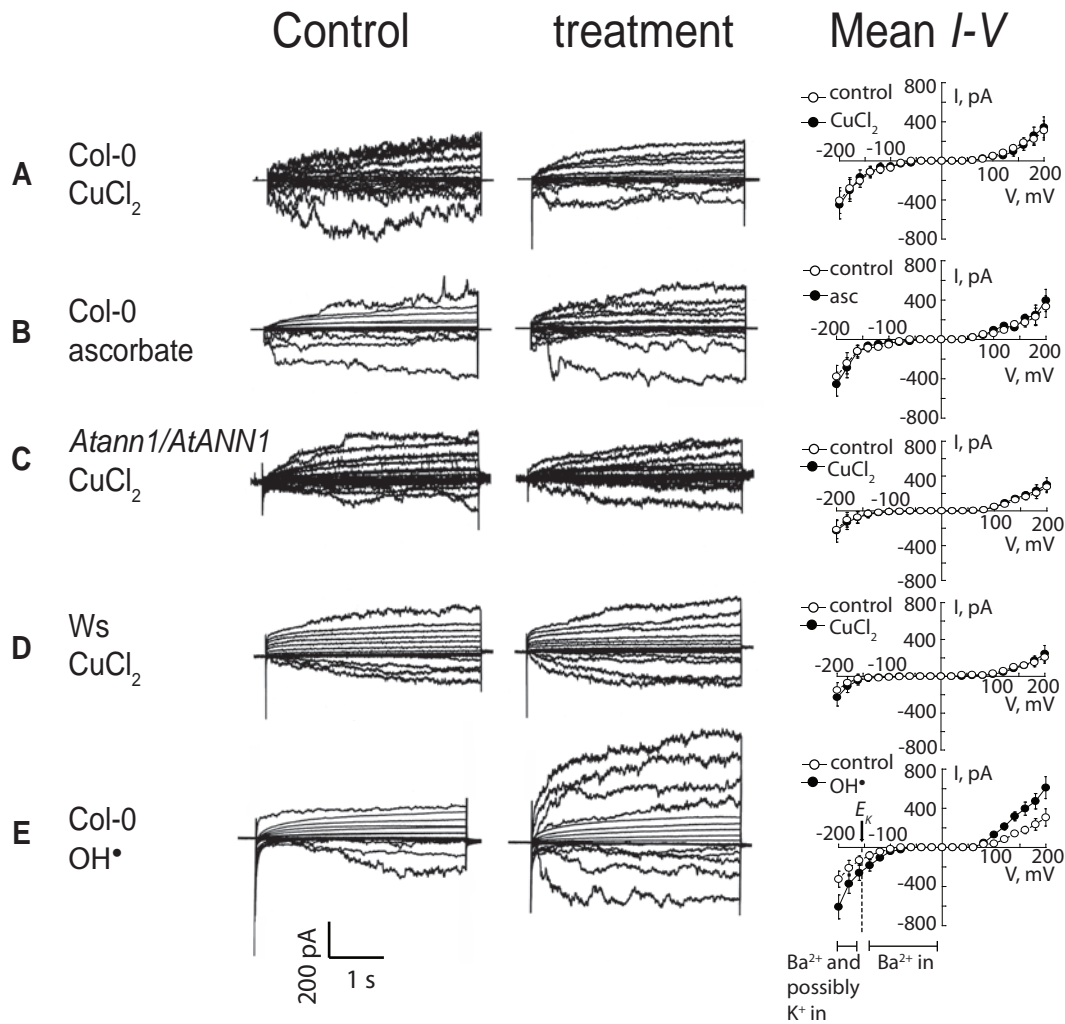

**Supplemental Figure 1. Copper or ascorbate alone do not elicit plasma membrane currents; copper and ascorbate together elicit a barium-permeable inward conductance.** Whole cell patch clamp recordings from epidermal protoplast plasma membrane. Recording conditions as in Figure 1 unless otherwise stated. **(A)** Col-0. Left, control currents ( $I$ ) elicited by step voltage ( $V$ ) changes, from a representative protoplast. Centre,  $I$  after exposure to extracellular 1 mM  $\text{CuCl}_2$ . Right, mean  $\pm$  S.E.M.  $I-V$  relationships for control (open circles) and test exposure ( $n = 3$ ). **(B)** Col-0 response to 1 mM ascorbate ( $n = 3$ ). **(C)** *ann1/ANN1* response to 1 mM  $\text{CuCl}_2$  ( $n = 3$ ). **(D)** WS response to 1 mM  $\text{CuCl}_2$  ( $n = 3$ ). **(E)** Col-0 response to extracellular  $\text{OH}^\bullet$  generated by 1 mM copper and 1 mM ascorbic acid with  $\text{BaCl}_2$  replacing  $\text{CaCl}_2$  in the bath solution ( $n = 3$ ). Negative current to the left of the equilibrium potential for  $\text{K}^+$  ( $E_K$ ) can be carried by  $\text{Ba}^{2+}$  (as a proxy for  $\text{Ca}^{2+}$ ) with a possible  $\text{K}^+$  component. Negative current to the right of  $E_K$  is carried by  $\text{Ba}^{2+}$ .

## Figure S2

### A. Control current at 0, -20 and +20 mV

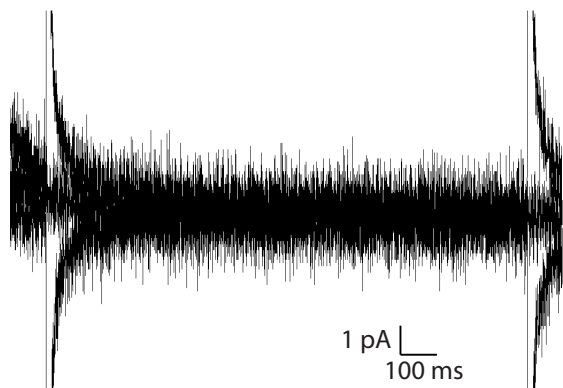

### B. OH<sup>•</sup>-activated current at 0, -20 and +20 mV

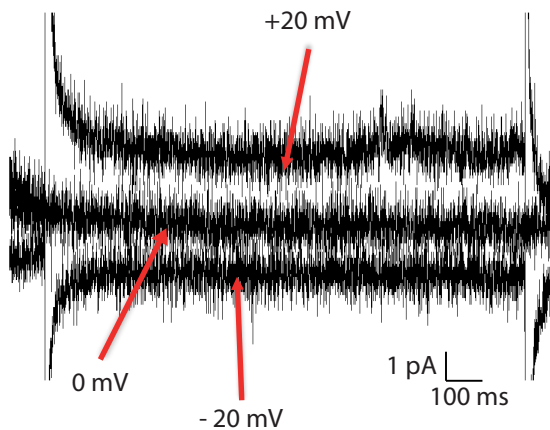

**Supplemental Figure 2. Expanded planar lipid bilayer traces.** Current traces are those shown in Figure 7C for control (**A**) and in the presence of hydroxyl radicals (**B**). There are measurable increases in current magnitude evoked by radicals even at the lowest voltages applied ( $\pm 20$  mV).

## Figure S3

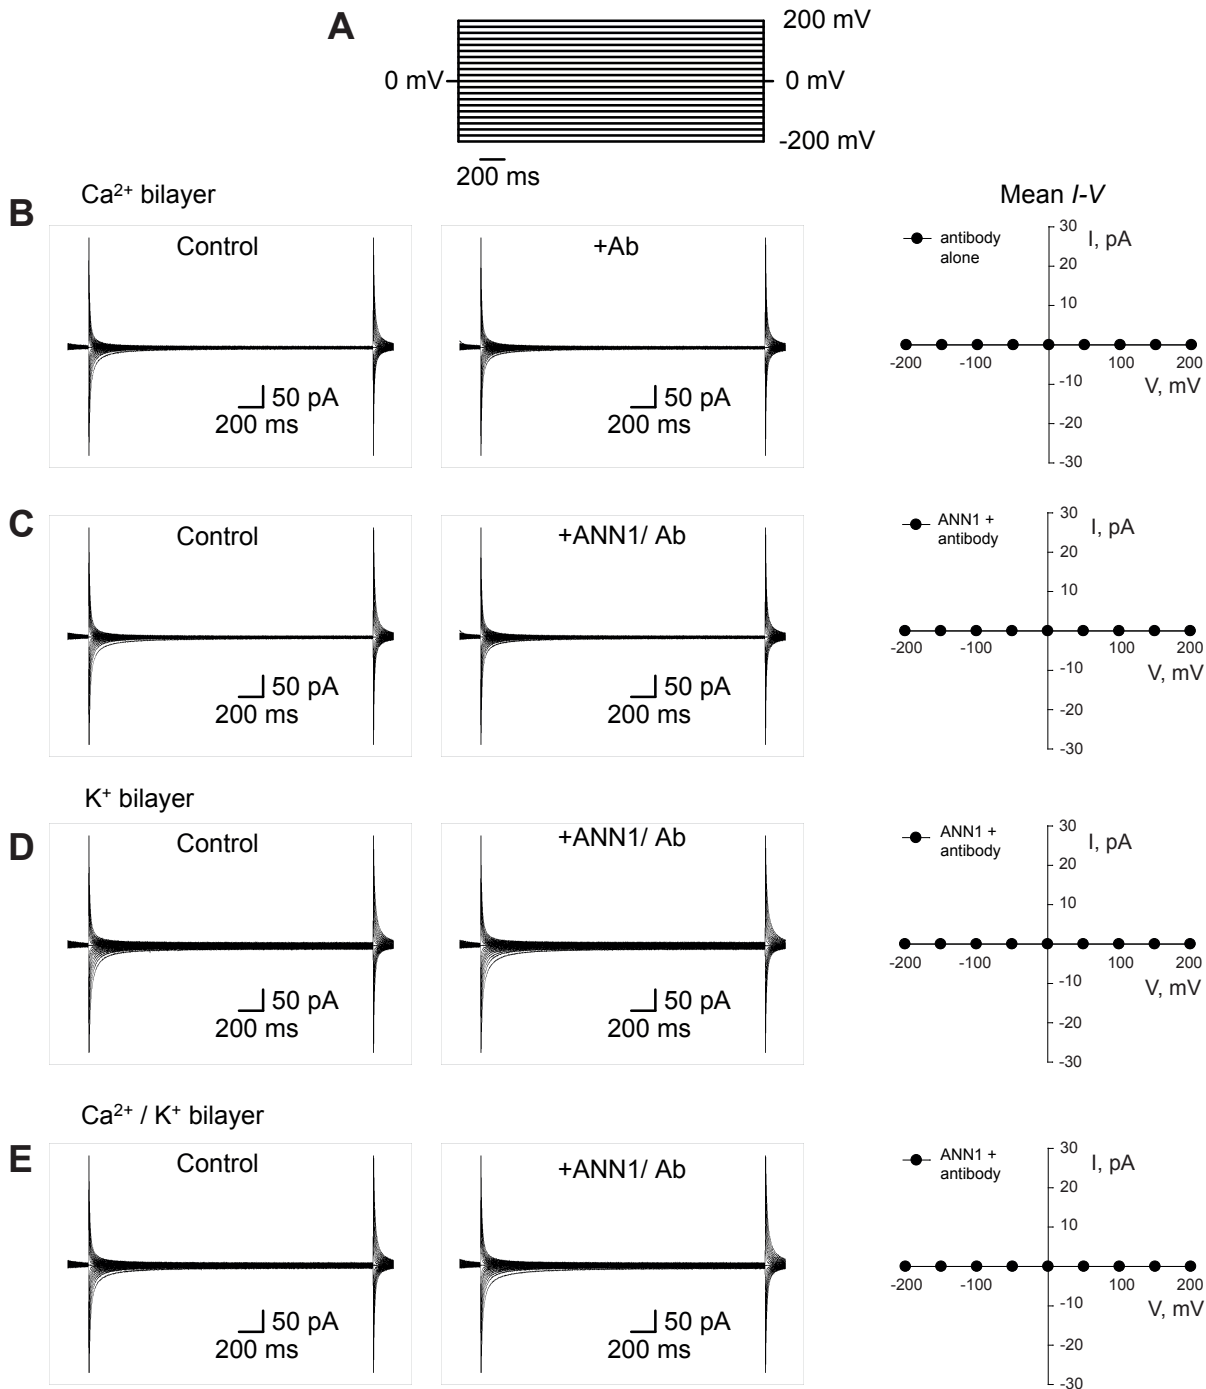

**Supplemental Figure 3. Immunoprecipitated ANN1 does not support a conductance in planar lipid bilayers.**

The ANN1 preparation was incubated for 30 minutes with anti-ANN1 peptide antibody in a 2:1 ratio. Antibody (Ab) alone was used as a control. **(A)**. Schematic representation of the voltage pulse protocol used in planar lipid bilayer studies. **(B)**. Representative current traces and mean *I-V* relationships. The *cis* chamber contained 1 mM Ca<sup>2+</sup>, the *trans* contained 200 mM Ca<sup>2+</sup>, both pH 6. Left panel, OH<sup>-</sup> were generated in the *trans* chamber by Cu-Asc. Centre panel, OH<sup>-</sup> were generated in the *trans* chamber by Cu-Asc, the *cis* chamber contained Ab. Right panel, *I-V* relationship for the PLB with Ab and OH<sup>-</sup>. **(C)**. Ionic conditions as **(B)** but in the centre panel, immunoprecipitated ANN1 (ANN1/Ab) was in the *cis* chamber and OH<sup>-</sup> were generated in the *trans* chamber. Right panel, *I-V* relationship for ANN1/Ab. **(D)**. *Cis* contained 200 mM KCl; *trans* 50 mM KCl; both pH 6. Left panel, OH<sup>-</sup> were generated in the *trans* chamber. Centre panel, OH<sup>-</sup> were generated in the *trans* chamber, ANN1/Ab was in the *cis* chamber. Right panel, *I-V* relationship for ANN1/Ab. **(E)**. *Cis* chamber held 200 mM K<sup>+</sup>, 1 mM CaCl<sub>2</sub> and the *trans* held 1 mM K<sup>+</sup>, 200 mM CaCl<sub>2</sub>, both pH 6. Left panel, OH<sup>-</sup> were generated in the *trans* chamber. Centre panel, OH<sup>-</sup> were generated in the *trans* chamber, ANN1/Ab was in the *cis* chamber. Right panel, *I-V* relationship for ANN1/Ab. Observations were made for 2 hours. For all data sets, *n* = 4 except **(E)**, where *n* = 3.

**Supplemental Table 1. Root plasma membrane currents.** Mean  $\pm$  SEM currents (in pA) are reported for epidermal protoplasts ( $n = 6$ ) and root hair apical spheroplasts ( $n = 6$ ) of the genotypes used in this study, determined using whole cell mode of patch clamp electrophysiology. *ann1/ANN1* denotes the complemented *ann1* mutant. Values were determined under control conditions and at maximal response to the generation of OH $\cdot$  by 1 mM Cu-Asc addition. Current recorded at a membrane potential of -200 mV (inside negative) was inward and denoted by a negative value. That at +200 mV was outward and denoted by a positive value.

|                       | <b>-200 mV (Ca<sub>in</sub>)</b> |                | <b>200 mV (K<sub>out</sub>)</b> |               |
|-----------------------|----------------------------------|----------------|---------------------------------|---------------|
| <b>Epidermis</b>      | Control                          | OH $\cdot$     | Control                         | OH $\cdot$    |
| WT (Col-0)            | -181 $\pm$ 56                    | -487 $\pm$ 123 | 280 $\pm$ 102                   | 829 $\pm$ 156 |
| <i>ann1</i>           | -142 $\pm$ 58                    | -160 $\pm$ 43  | 263 $\pm$ 108                   | 249 $\pm$ 106 |
| <i>ann1/ANN1</i>      | -231 $\pm$ 78                    | -569 $\pm$ 133 | 298 $\pm$ 128                   | 847 $\pm$ 148 |
| WT (WS)               | -191 $\pm$ 88                    | -562 $\pm$ 94  | 246 $\pm$ 122                   | 840 $\pm$ 164 |
| <i>gork</i>           | -222 $\pm$ 99                    | -527 $\pm$ 128 | 265 $\pm$ 84                    | 811 $\pm$ 144 |
| <b>Root hair apex</b> | Control                          | OH $\cdot$     | Control                         | OH $\cdot$    |
| WT (Col-0)            | -53 $\pm$ 38                     | -280 $\pm$ 73  | 185 $\pm$ 68                    | 511 $\pm$ 106 |
| <i>ann1</i>           | -17 $\pm$ 4                      | -10 $\pm$ 3    | 231 $\pm$ 66                    | 249 $\pm$ 56  |
